# Supplementary material for: Plant Performance and Soil Fungal Community Impacts of Enhancing Dioscorea opposita with Spraying Foliar Fertilizer with Different Nutrient Element Combinations
Source: MDPI journal article supplement (doi:10.3390/agronomy12092017), 2022-08-26
Supplement: s1 [file s1]

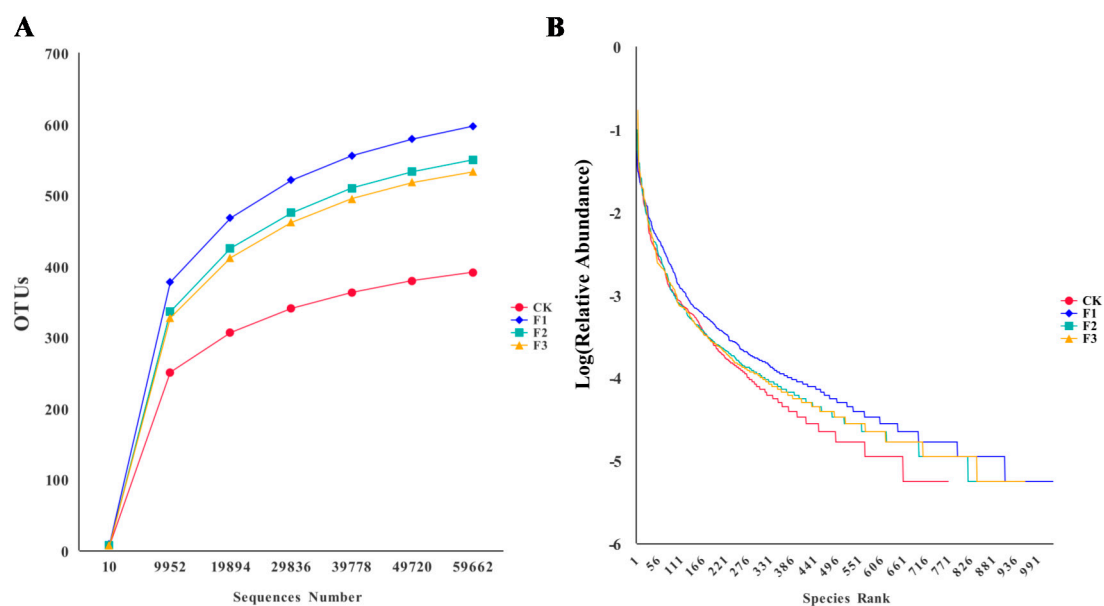

**Figure S1.** The rarefaction curve (A) and the abundance ranking of operational taxonomic units (OTUs) (B) of Chinese yam rhizosphere fungi under different foliar fertilizer. CK, spray with water; F1, NPK foliar fertilizer; F2, NPK+Fe-Mn-Zn foliar fertilizer; F3, Fe-Mn-Zn foliar fertilizer.

**Table S1.** Mantel tests showing correlations (R values) between MAE, MIE, plant growth parameters, active ingredients parameters, soil physicochemical parameters and fungi community composition.

| Variable | MAE     | MIE   | PGI     | PAIC   | PMA    | PMI   | SEA    | SMA     | SMI   | SPC    | Fungi |
|----------|---------|-------|---------|--------|--------|-------|--------|---------|-------|--------|-------|
| MAE      | 1       |       |         |        |        |       |        |         |       |        |       |
| MIE      | -0.07   | 1     |         |        |        |       |        |         |       |        |       |
| PGI      | 0.35*** | 0.05  | 1       |        |        |       |        |         |       |        |       |
| PAIC     | 0.14*   | 0.17* | 0.13*   | 1      |        |       |        |         |       |        |       |
| PMA      | 0.26**  | 0.07  | 0.16*   | 0.11*  | 1      |       |        |         |       |        |       |
| PMI      | -0.13*  | 0.25* | -0.08   | -0.18* | -0.12* | 1     |        |         |       |        |       |
| SEA      | 0.15*   | 0.02  | 0.11*   | 0.03   | -0.06  | -0.02 | 1      |         |       |        |       |
| SMA      | 0.11*   | 0.05  | 0.05    | 0.08   | 0.01   | 0.03  | -0.06  | 1       |       |        |       |
| SMI      | -0.16*  | 0.13* | -0.13*  | -0.04  | -0.10* | 0.14* | 0.09   | -0.04   | 1     |        |       |
| SPC      | -0.12*  | 0.10* | -0.21** | 0.03   | 0.04   | 0.08  | -0.15* | -0.06   | 0.04  | 1      |       |
| Fungi    | 0.08    | -0.07 | 0.17*   | 0.05   | -0.15* | -0.05 | 0.18*  | -0.22** | 0.13* | 0.20** | 1     |

**Table S2.** Optimal range of soil parameters for yam growth under foliar fertilizer treatment.

|                      | Total samples | Range       | Mean±SD    | Sub-optimum |    | Optimum |    | Super-Optimum |    | Optimum range |
|----------------------|---------------|-------------|------------|-------------|----|---------|----|---------------|----|---------------|
|                      |               |             |            | Sample      | %  | Sample  | %  | Sample        | %  |               |
| Organic matter(mg/g) | 20            | 8.64~11.84  | 10.24±1.37 | 8           | 40 | 10      | 50 | 2             | 10 | 9.0~11.5      |
| pH                   | 20            | 7.78~8.13   | 7.95±0.08  | 10          | 50 | 6       | 30 | 4             | 20 | 7.8~8.1       |
| Available N(mg/kg)   | 20            | 54.71~71.82 | 62.25±4.61 | 8           | 40 | 5       | 25 | 7             | 35 | 60.0~68.0     |
| Available P(mg/kg)   | 20            | 6.42~8.41   | 7.45±0.73  | 12          | 60 | 8       | 40 | 0             | 0  | 6.5~8.0       |

|           |    |                  |             |    |    |    |    |   |    |            |
|-----------|----|------------------|-------------|----|----|----|----|---|----|------------|
| Available |    |                  |             |    |    |    |    |   |    |            |
| K(mg/kg)  | 20 | 88.64~<br>115.91 | 100.85±7.70 | 4  | 20 | 11 | 55 | 5 | 25 | 95.0~102.0 |
| Fe (g/kg) | 20 | 18.83~26.67      | 23.19±2.94  | 10 | 50 | 4  | 20 | 6 | 30 | 20.0~24.0  |
| Mn(g/kg)  | 20 | 0.29~0.61        | 0.42±0.11   | 15 | 75 | 5  | 25 | 0 | 0  | 0.3~0.5    |
| Zn (g/kg) | 20 | 0.059~0.094      | 0.075±0.014 | 3  | 15 | 13 | 65 | 4 | 20 | 0.06~0.08  |

Note: The setting of the optimal range mainly refers to the comprehensive evaluation of yam growth morphology and rhizosphere soil parameters in this study.
